# Supplementary material
Source: PubMed Central journal article supplement (PMC8664158)

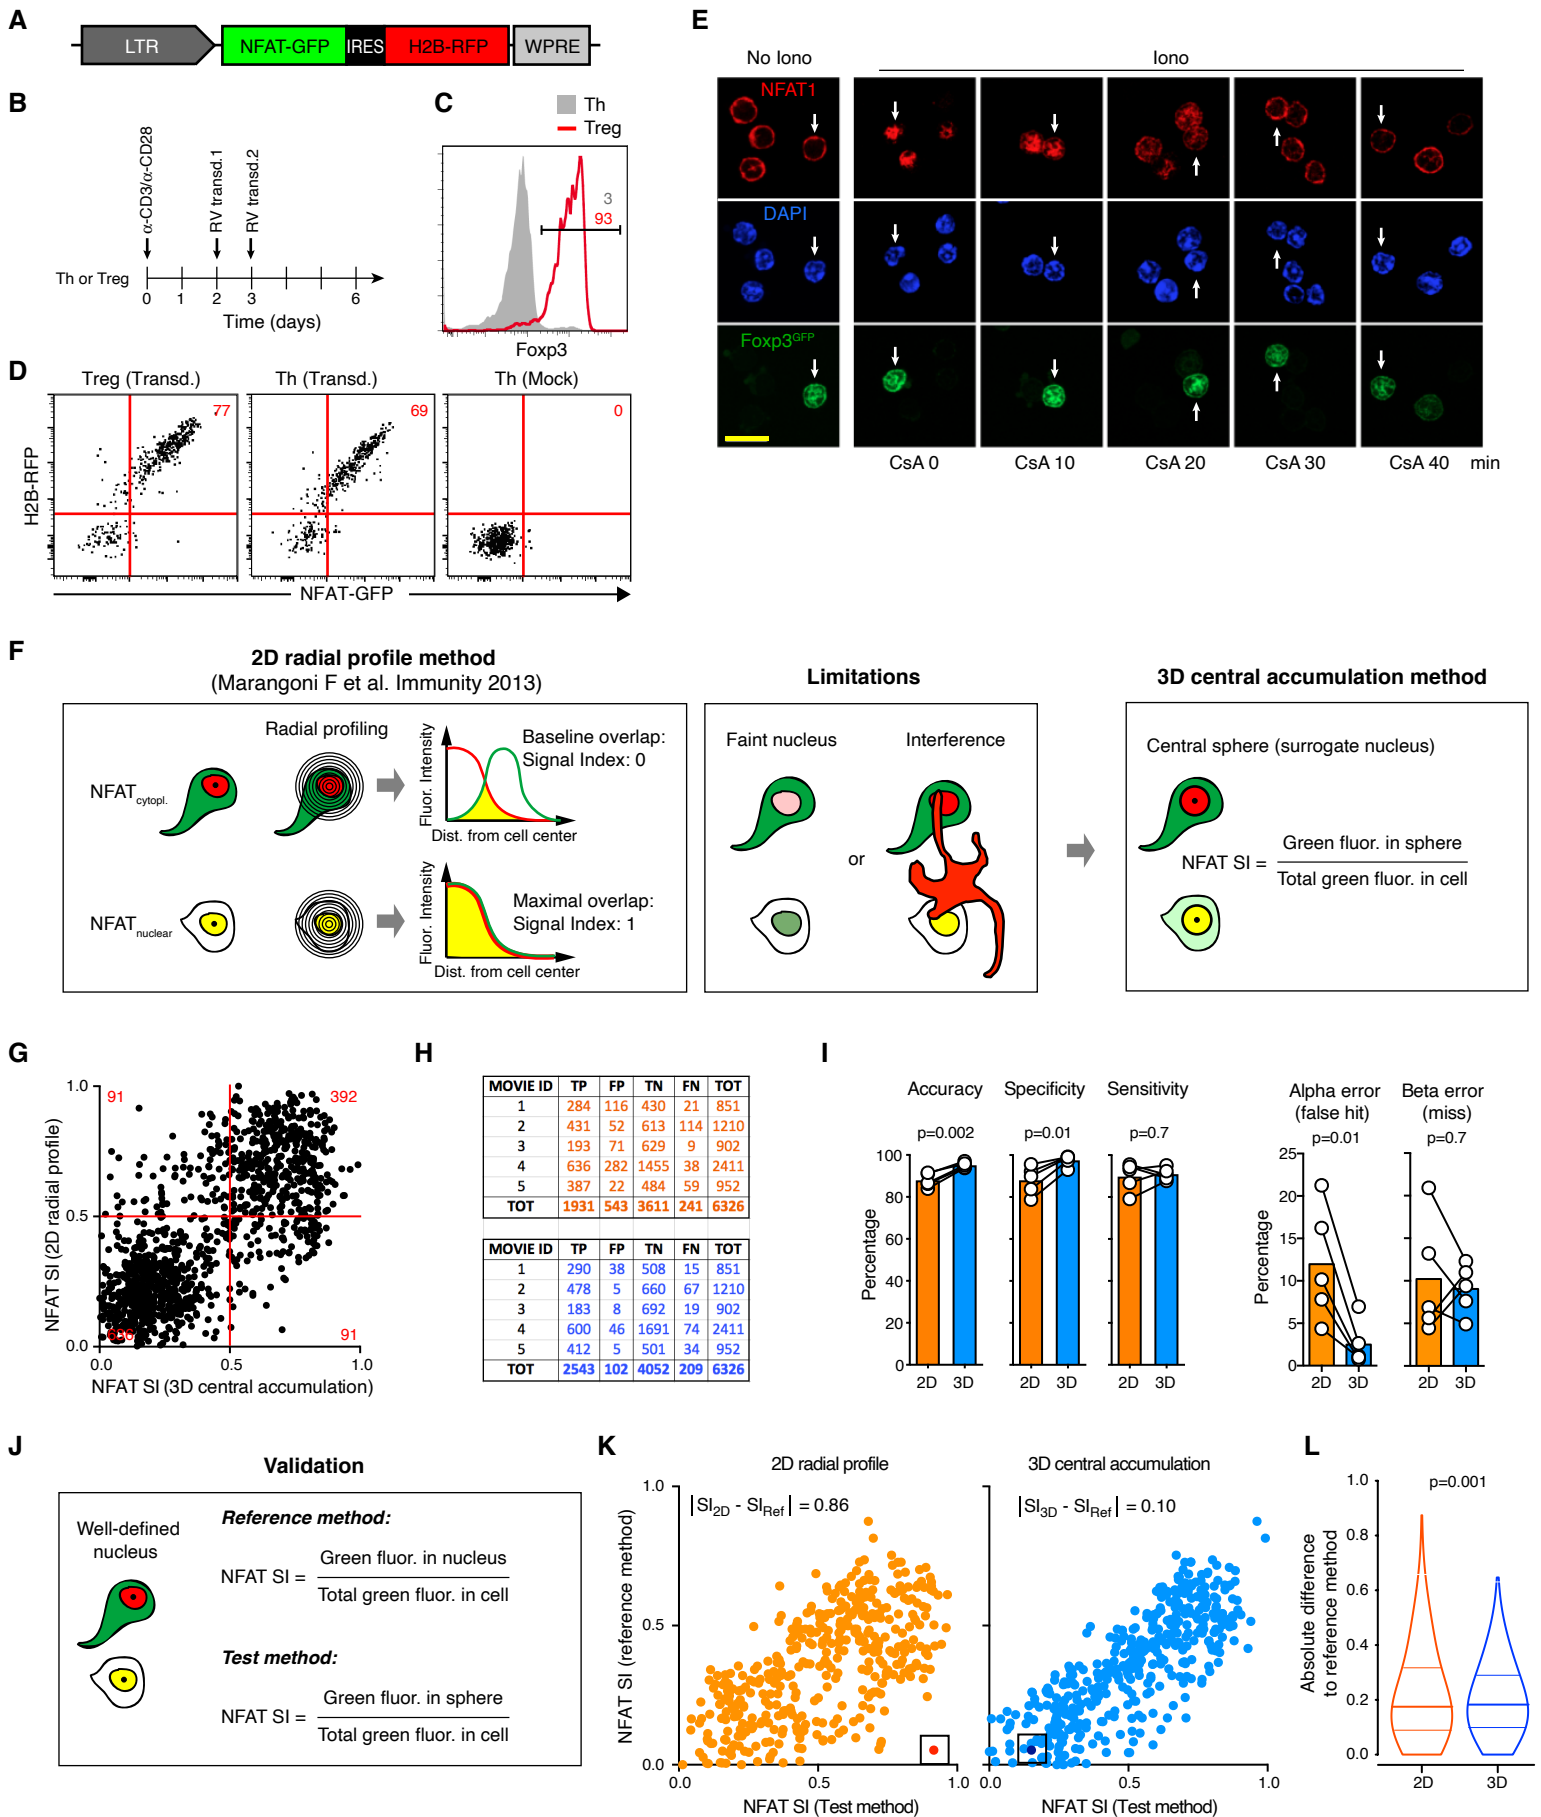

**Figure S1**

Supplement: NIHMS1716505-supplement-1.pdf [file NIHMS1716505-supplement-1.pdf]

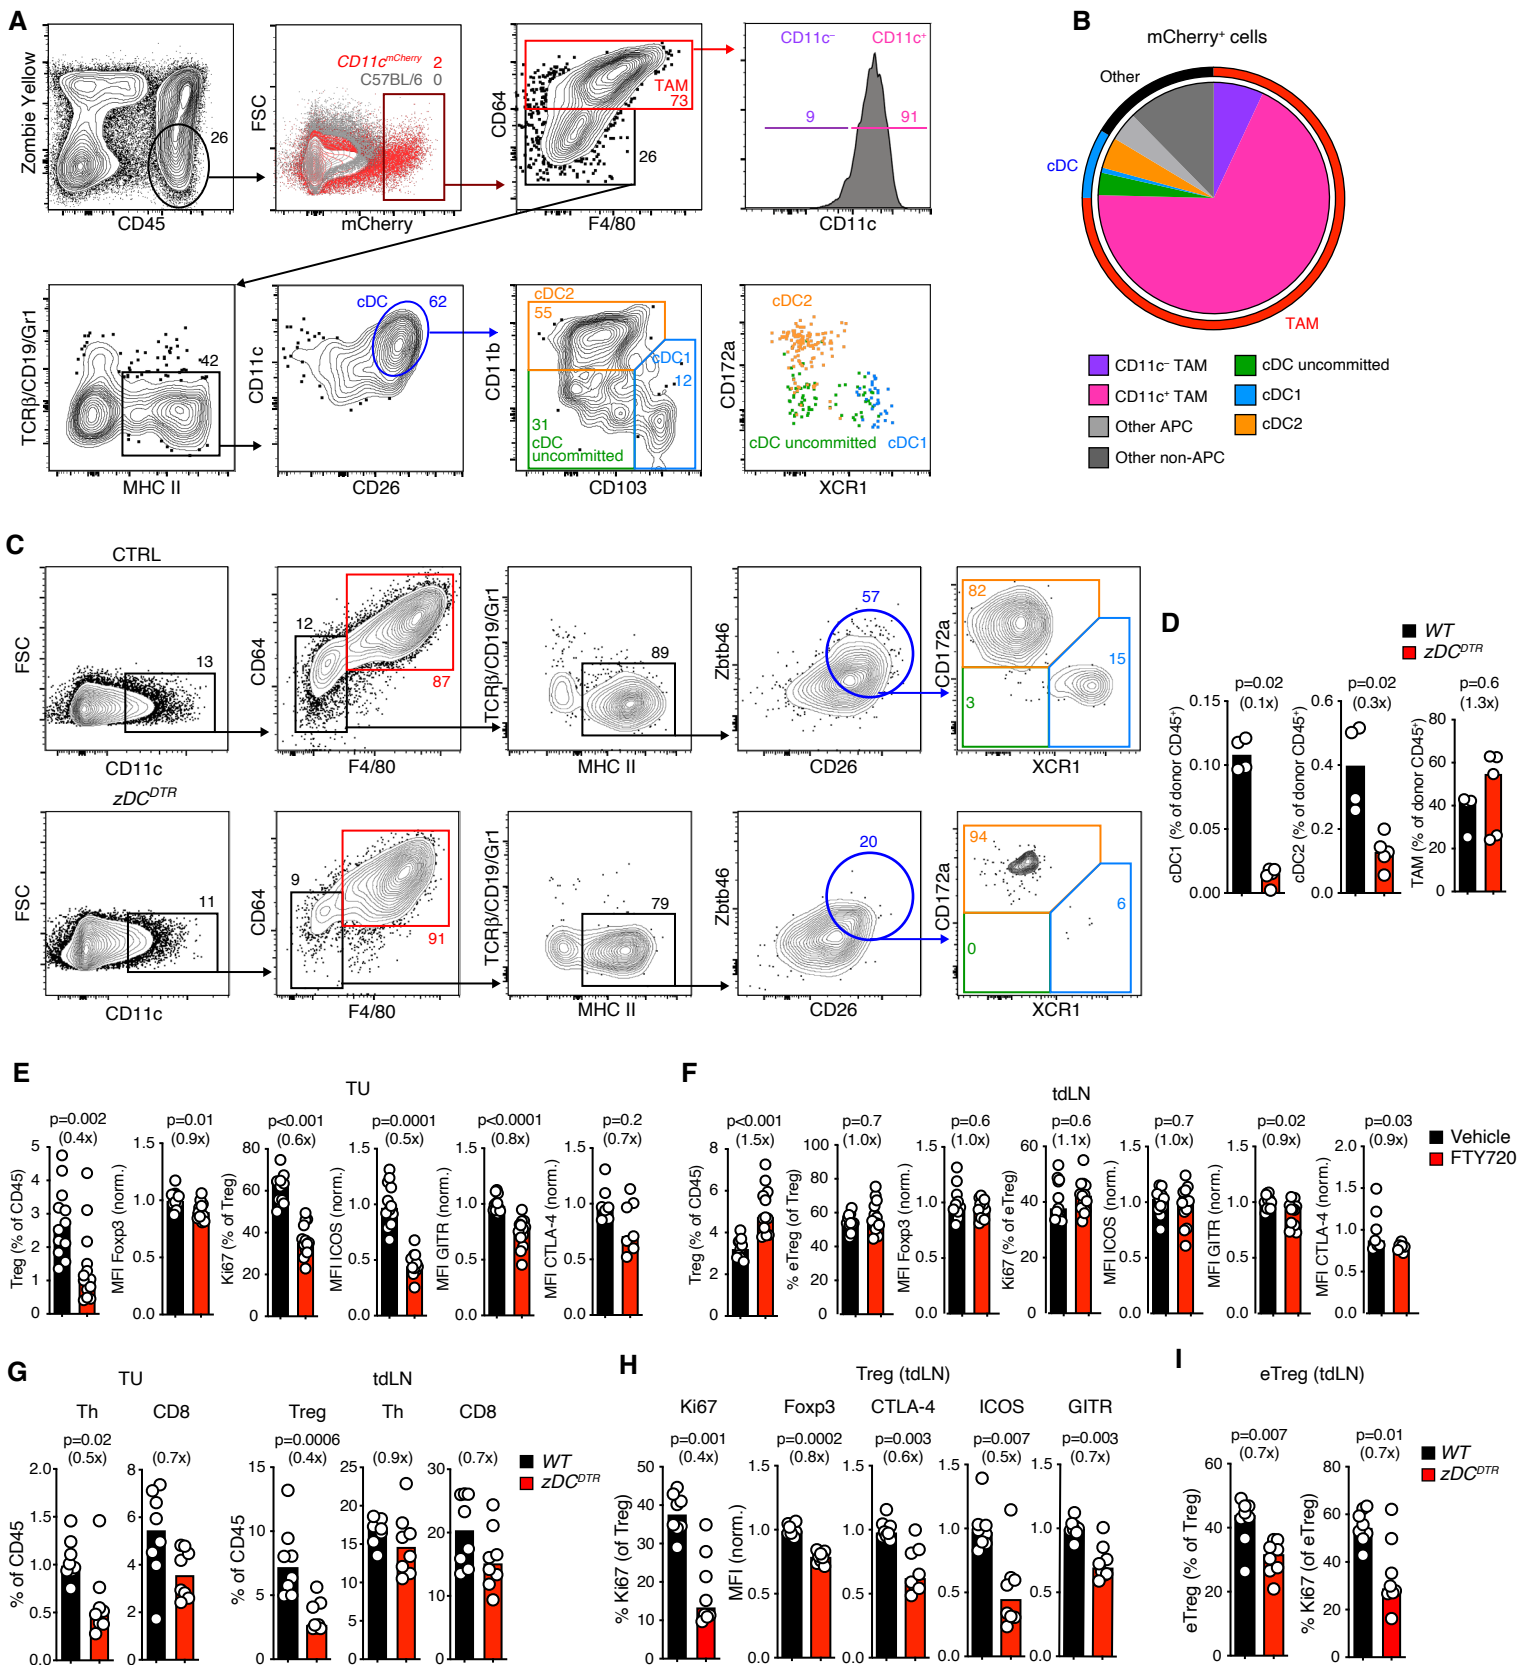

Figure S2

Supplement: NIHMS1716505-supplement-2.pdf [file NIHMS1716505-supplement-2.pdf]

**A**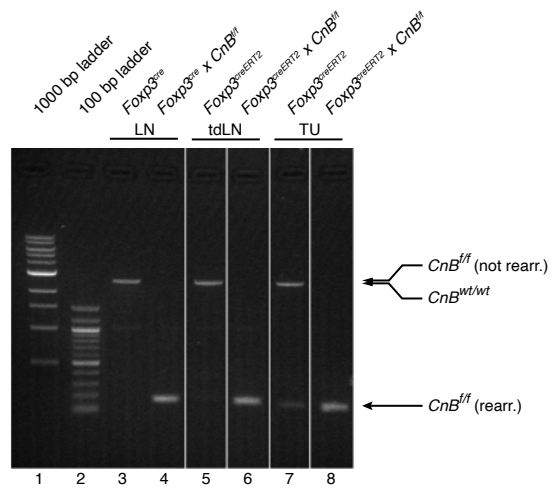**B**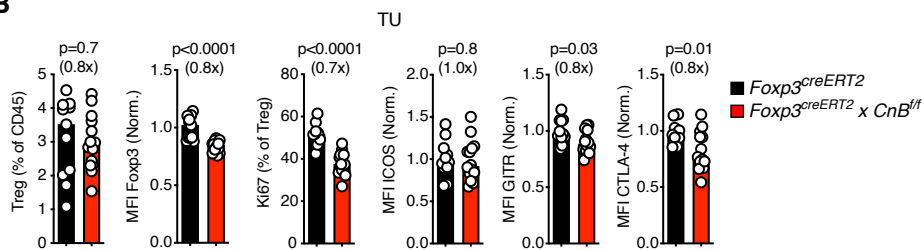**C**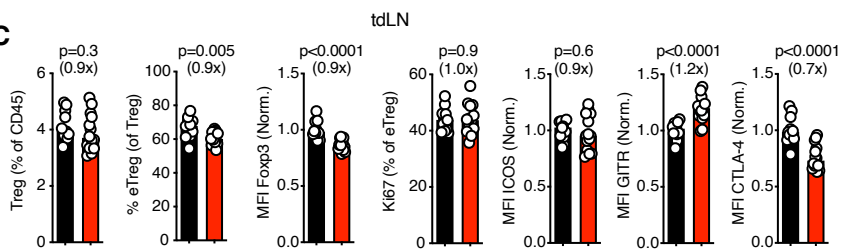

Supplement: NIHMS1716505-supplement-3.pdf [file NIHMS1716505-supplement-3.pdf]

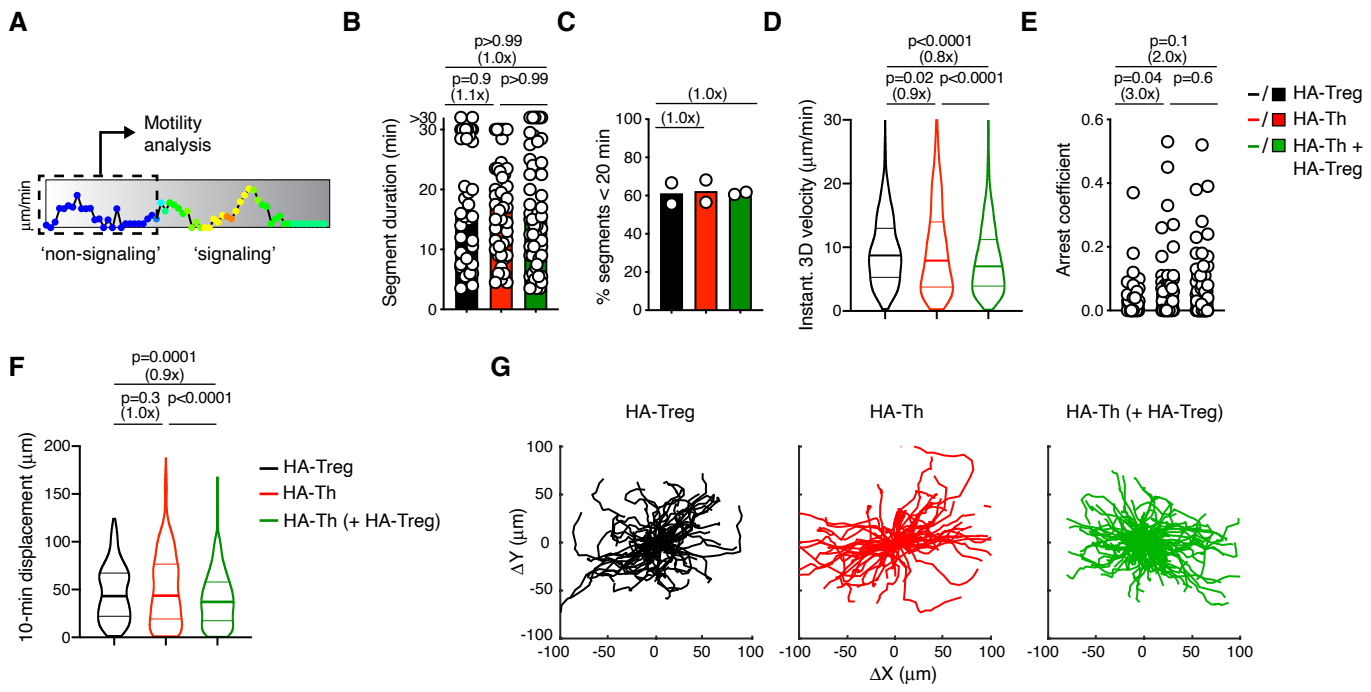

Figure S4

Supplement: NIHMS1716505-supplement-4.pdf [file NIHMS1716505-supplement-4.pdf]

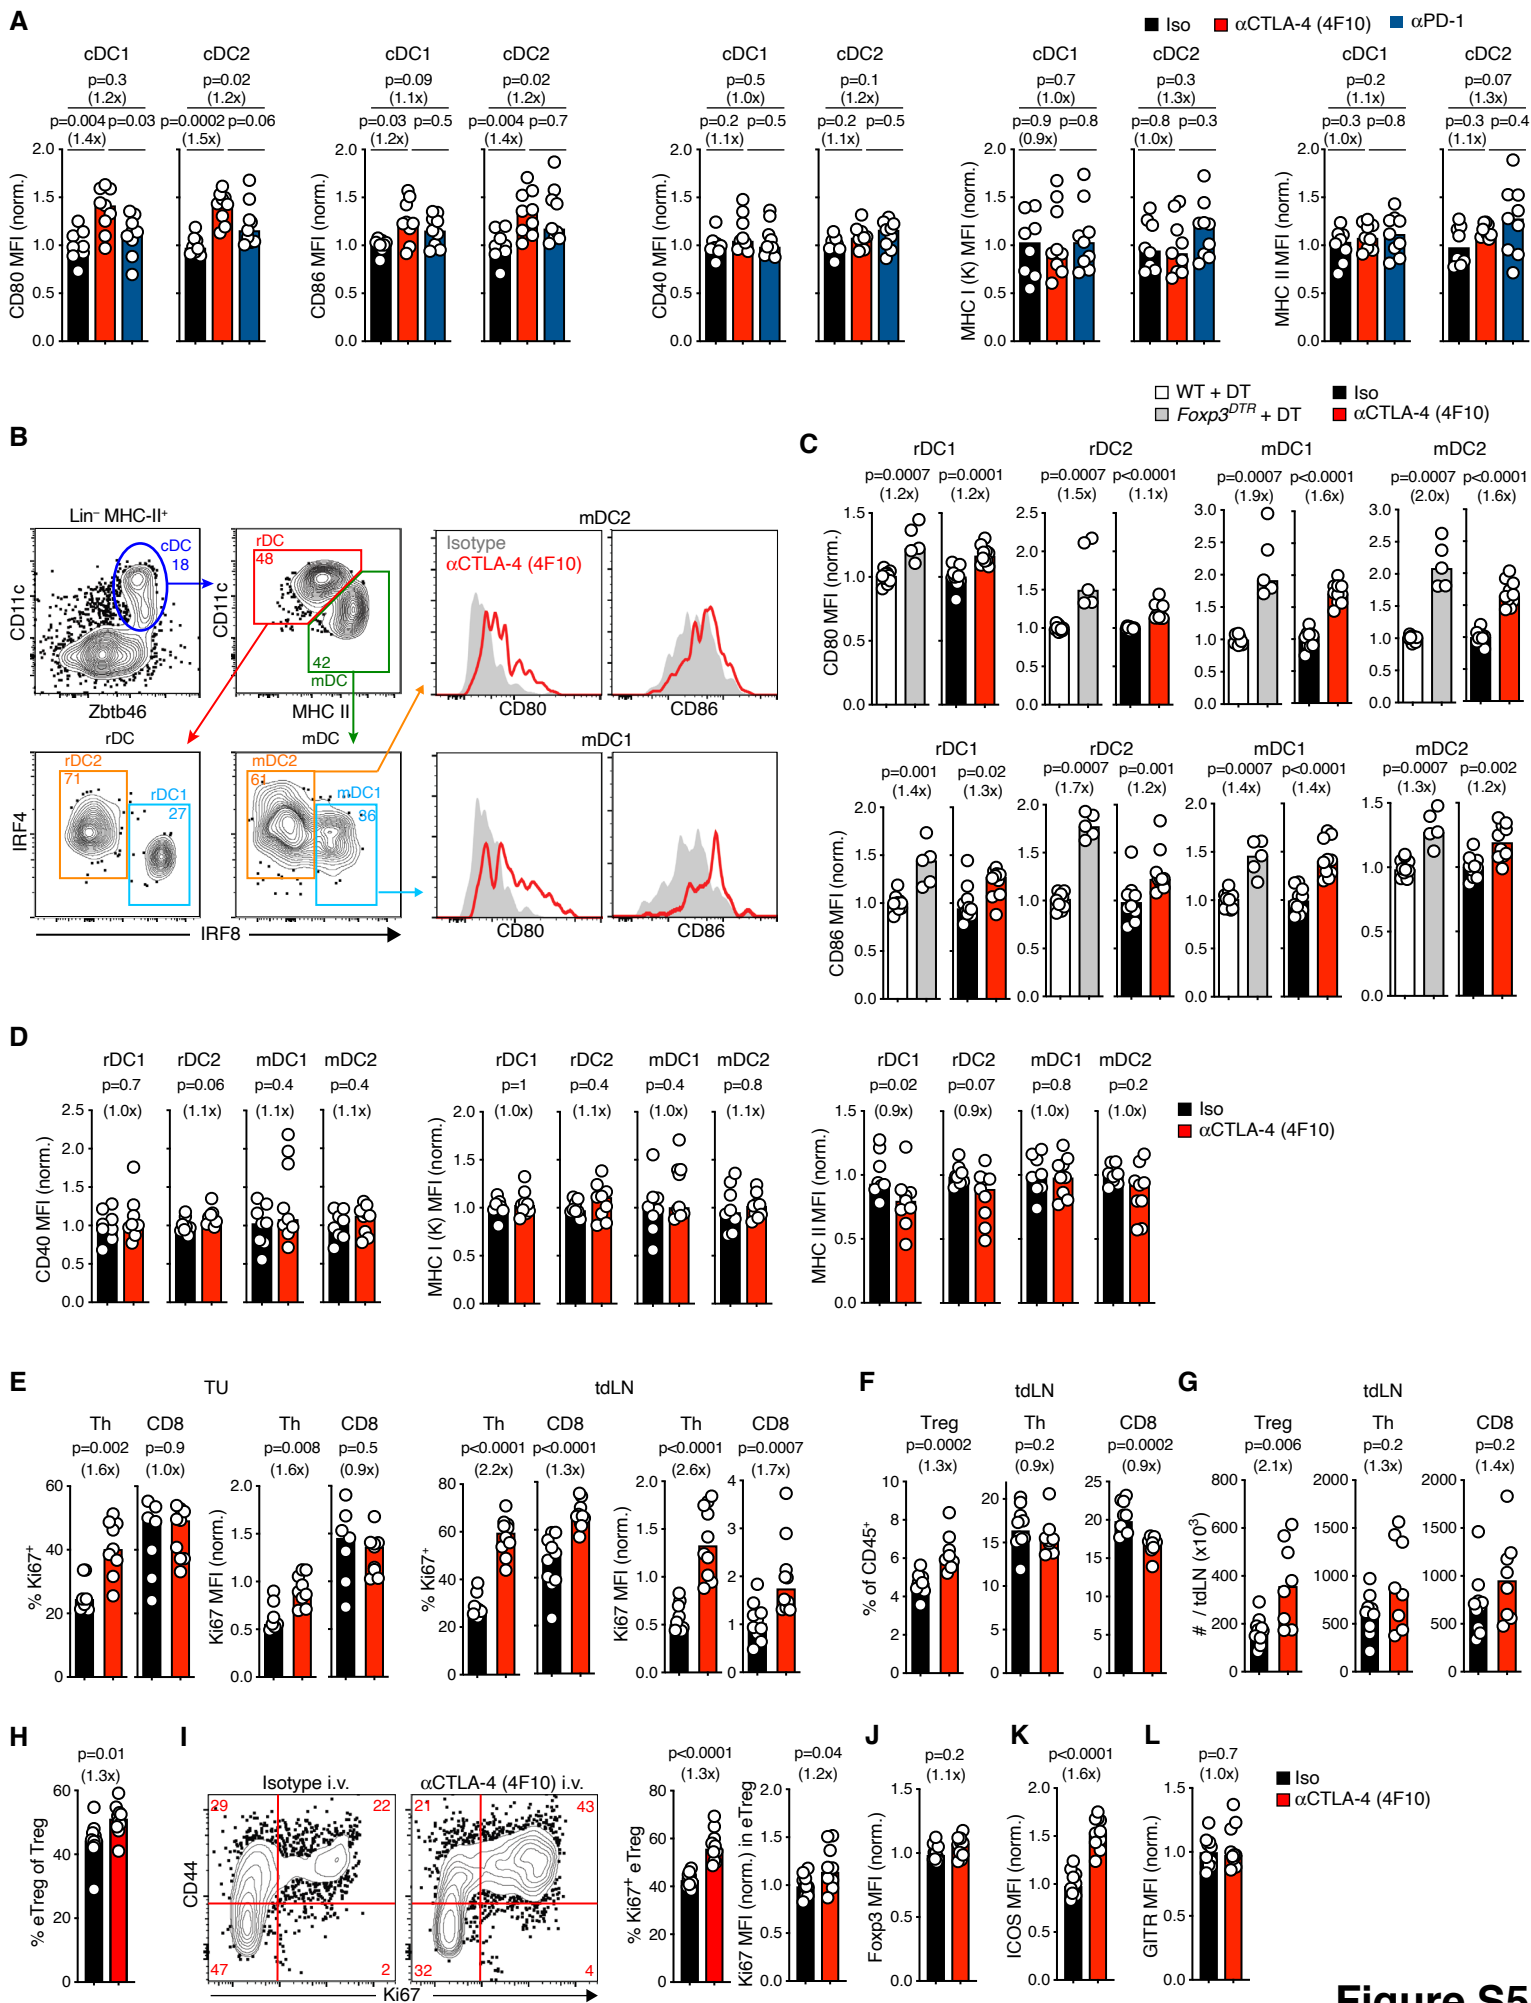

**Figure S5**

Supplement: NIHMS1716505-supplement-5.pdf [file NIHMS1716505-supplement-5.pdf]

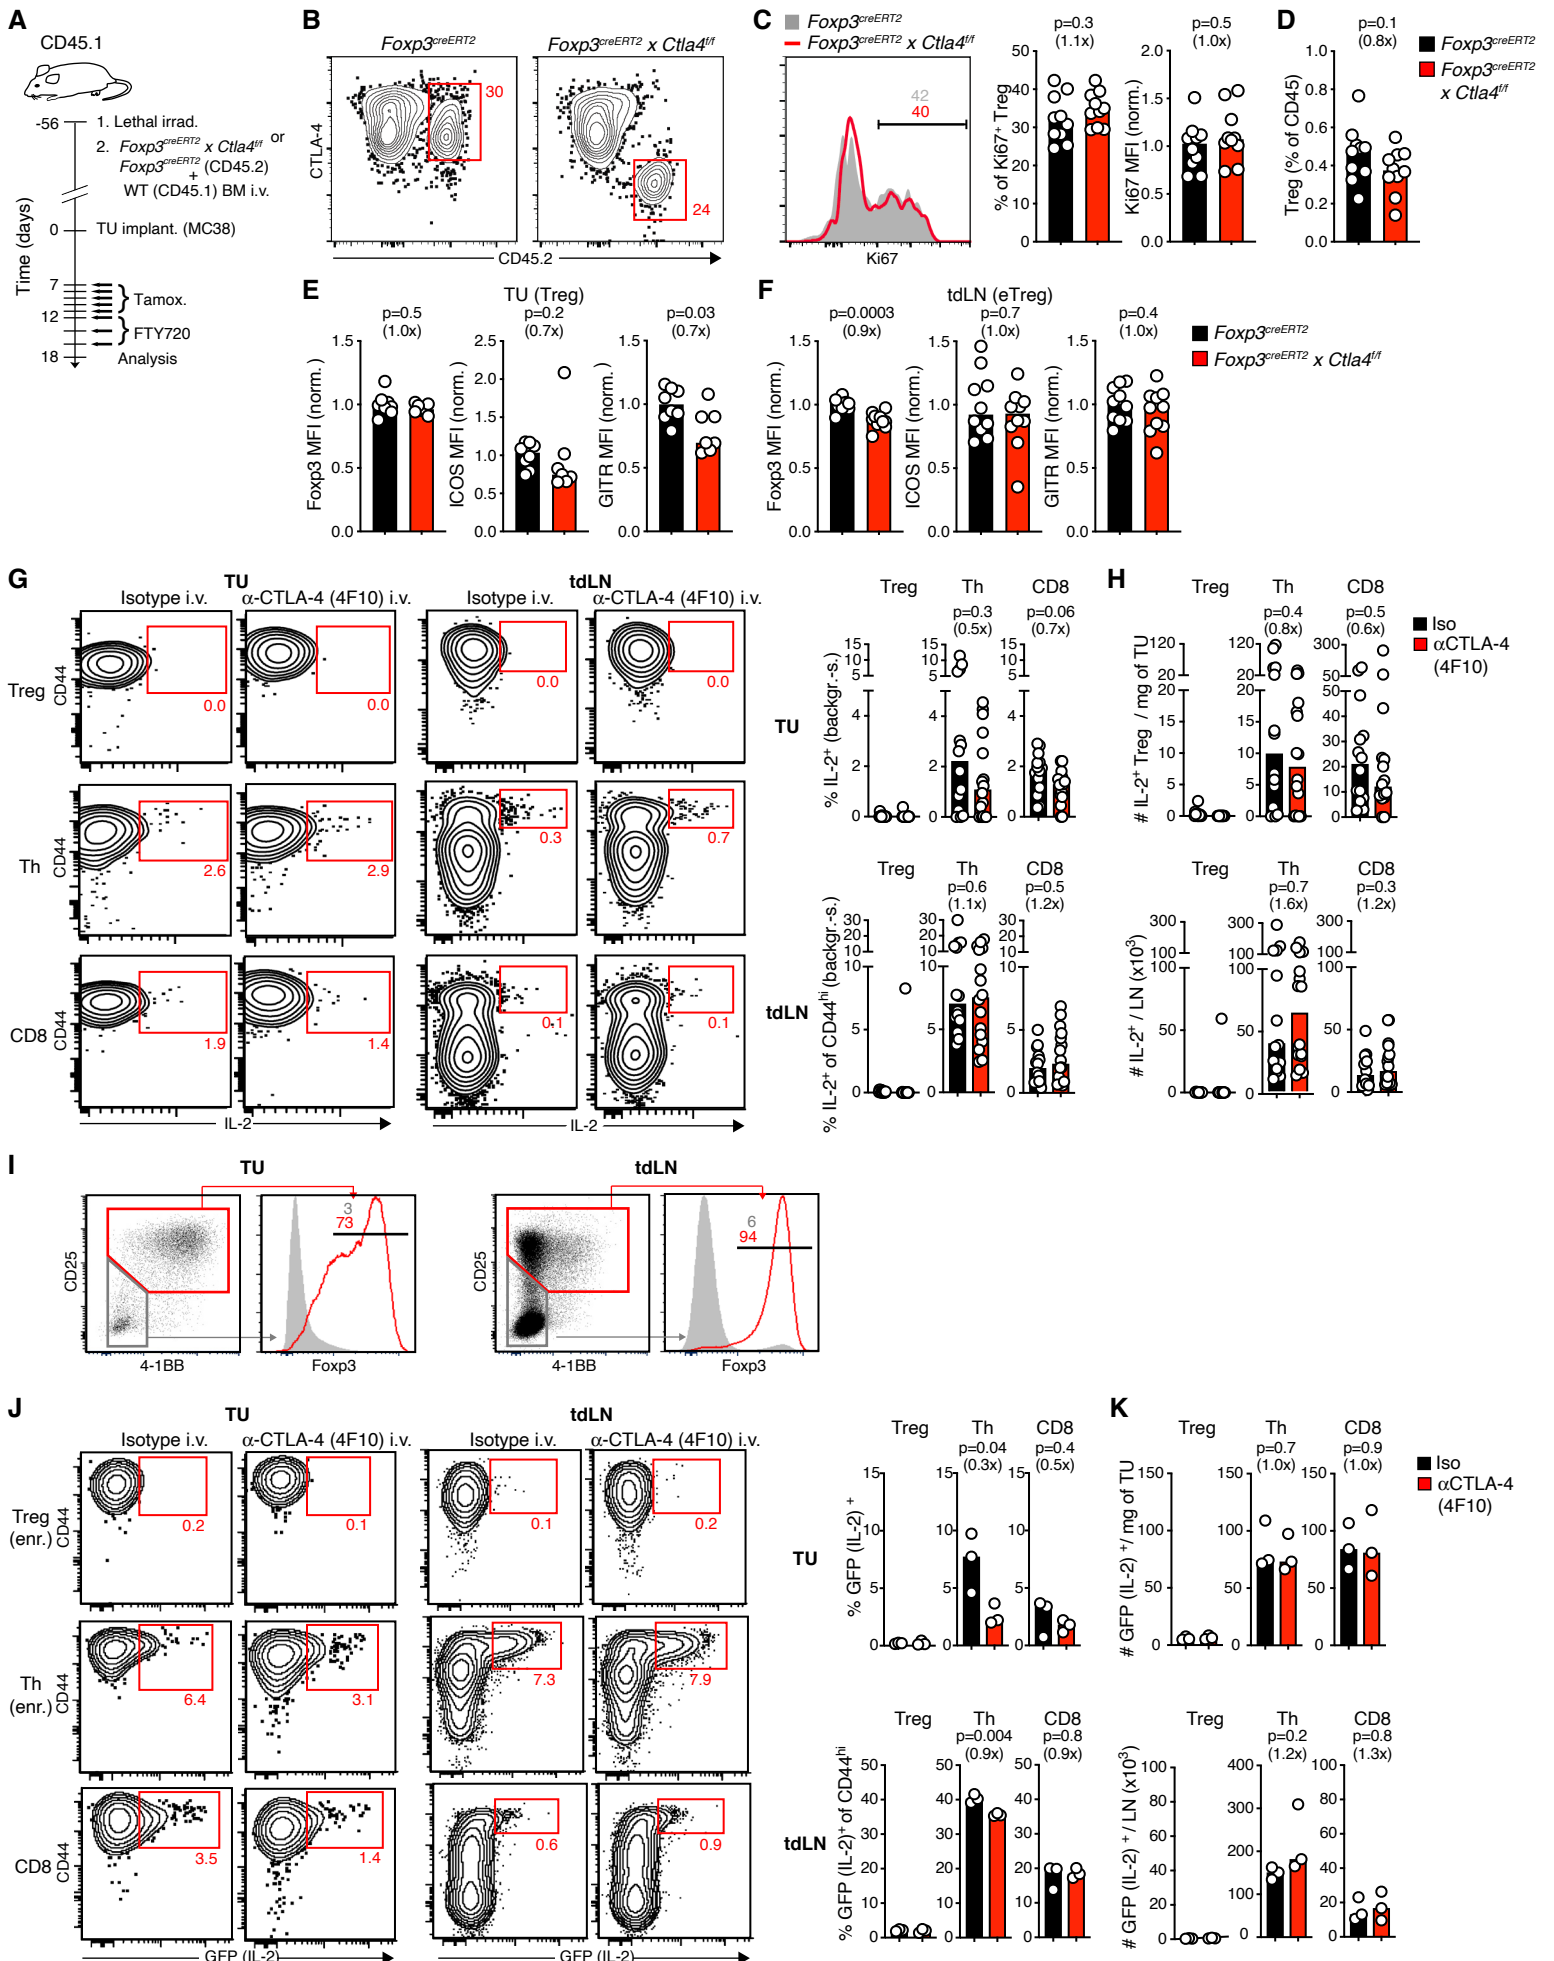

**Figure S6**

Supplement: NIHMS1716505-supplement-6.pdf [file NIHMS1716505-supplement-6.pdf]

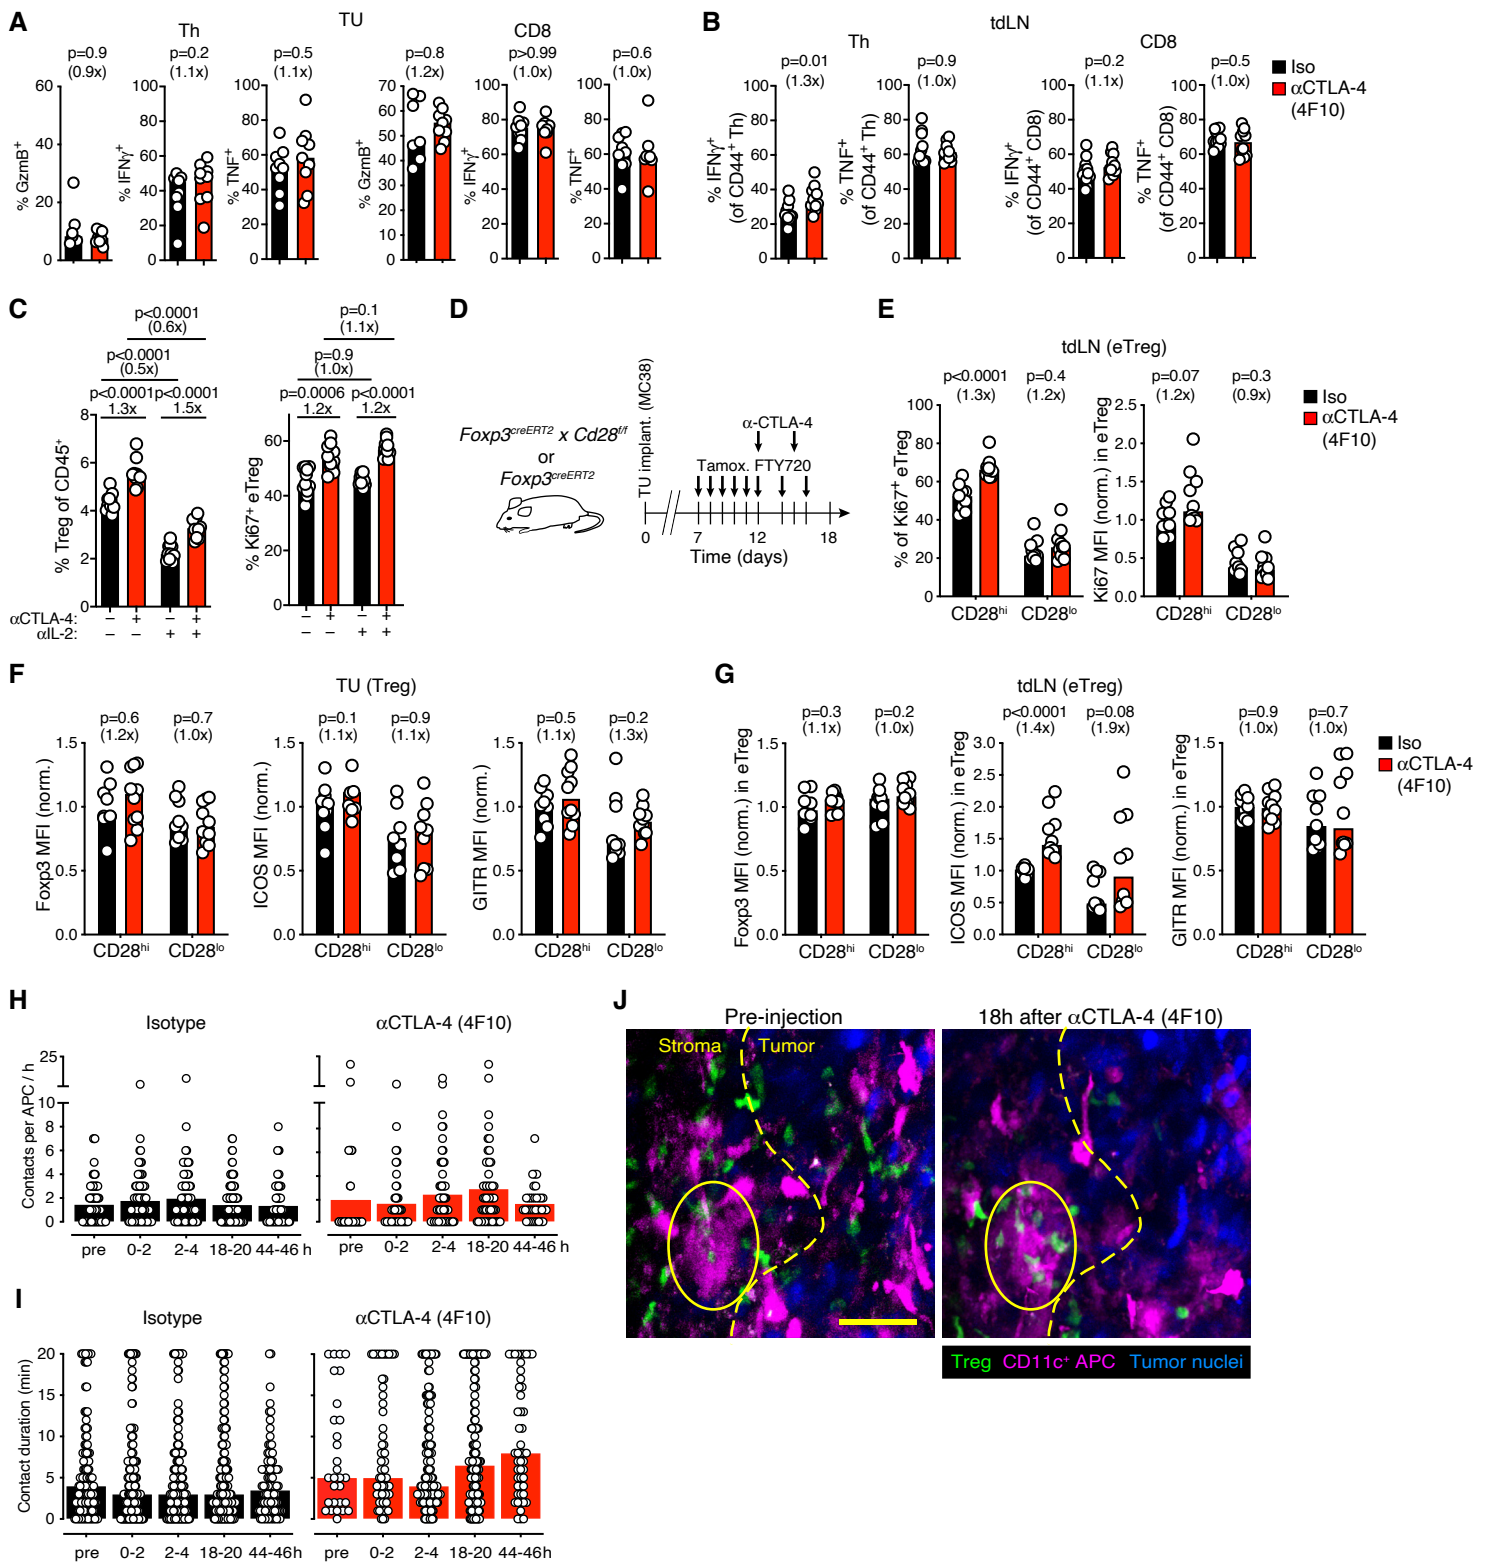

Figure S7

Supplement: NIHMS1716505-supplement-7.pdf [file NIHMS1716505-supplement-7.pdf]
